# Supplementary material for: CRSP8-driven fatty acid metabolism reprogramming enhances hepatocellular carcinoma progression by inhibiting RAN-mediated PPARα nucleus-cytoplasm shuttling
Source: Springer Nature journal article supplement (doi:10.1186/s13046-025-03329-3), 2025-03-11
Supplement: MOESM4 [file 13046_2025_3329_MOESM4_ESM.pdf]

**CRSP8-driven Fatty Acid Metabolism Reprogramming Enhances Hepatocellular  
Carcinoma Progression by Inhibiting RAN-mediated PPAR $\alpha$  Nucleus-cytoplasm  
Shuttling**

Yuxi Lin, Zhixing Liang, Zhiyan Weng, Xiaofang Liu, Feng Zhang, Yutian Chong

Supplementary Materials.....2

Supplementary Figure and Figure legends .....8

Fig. S1 .....8

Fig. S2 .....10

Fig. S3 .....12

Fig. S4 .....13

Fig. S5 .....15

Fig. S6 .....17

Fig. S7 .....18

Fig. S8 .....20

Fig. S9 .....22

1 **Supplementary Materials**

2 **The specific primers used for qRT-PCR in the present study**

| Gene                                       | Forward primer          | Reverse primer          |
|--------------------------------------------|-------------------------|-------------------------|
| Human <i>CRSP8</i>                         | GTGTTCTGACTGCCTGAAGGA   | GGACAAGATTGTGGGCTGA     |
| Human <i>PPAR<math>\alpha</math></i>       | TTCGCAATCCATCGGCGAG     | CCACAGGATAAGTCACCGAGG   |
| Human <i>PPAR<math>\beta/\delta</math></i> | CAGGGCTGACTGCAAACGA     | CTGCCACAATGTCTCGATGTC   |
| Human <i>PPAR<math>\gamma</math></i>       | TACTGTCTGTTTCAGAAATGCC  | GTCAGCGGACTCTGGATTCTAG  |
| Human <i>RAN</i>                           | GGTGGTACTGGAAAAACGACC   | CCCAAGGTGGCTACATACTTCT  |
| Human <i>ACACA</i>                         | CATGCGGTCTATCCGTAGGTG   | GTGTGACCATGACAACGAATCT  |
| Human <i>ACLY</i>                          | TCGGCCAAGGCAATTCAGAG    | CGAGCATACTTGAACCGATTCT  |
| Human <i>CD36</i>                          | GGCTGTGACCGGAAGTGTG     | AGGTCTCCAAGTGGCATTAGAA  |
| Human <i>FASN</i>                          | AAGGACCTGTCTAGGTTTGATGC | TGGCTTCATAGGTGACTTCCA   |
| Human <i>FABP5</i>                         | TGAAGGAGCTAGGAGTGGGAA   | TGCACCATCTGTAAAGTTGCAG  |
| Human <i>FABP4</i>                         | ACTGGGCCAGGAATTTGACG    | CTCGTGGAAGTGACGCCTT     |
| Human <i>SCD1</i>                          | TCTAGCTCCTATACCACCACCA  | TCGTCTCCAAGTATCTCCTCC   |
| Human <i>ACSL1</i>                         | CTTATGGGCTTCGGAGCTTTT   | CAAGTAGTGCGGATCTTCGTG   |
| Human <i>ACSL3</i>                         | GCCGAGTGGATGATAGCTGC    | ATGGCTGGACCTCCTAGAGTG   |
| Human <i>ACSL5</i>                         | CTCAACCCGTCTTACCTCTTCT  | GCAGCAACTTGTTAGGTCATTG  |
| Human <i>SREBP1</i>                        | ACAGTGACTTCCCTGGCCTAT   | GCATGGACGGGTACATCTTCAA  |
| Human <i>SREBP2</i>                        | AACGGTCATTACCCAGGTC     | GGCTGAAGAATAGGAGTTGCC   |
| Human <i>HMGCR</i>                         | TGATTGACCTTTCCAGAGCAAG  | CTAAAATTGCCATTCCACGAGC  |
| Human <i>p62</i>                           | GCACCCCAATGTGATCTGC     | CGCTACACAAGTCGTAGTCTGG  |
| Human <i>LC3-I/II</i>                      | GATGTCCGACTTATTCGAGAGC  | TTGAGCTGTAAGCGCCTTCTA   |
| Human <i>ATG5</i>                          | AAAGATGTGCTTCGAGATGTGT  | CACTTTGTCAGTTACCAACGTCA |
| Human <i>ATGL</i>                          | GGCTTCCTCGGCGTCTACTA    | TTTACCAGGTTGAAGGAGGGG   |
| Human <i>LAMP1</i>                         | TCTCAGTGAAGTACGACACCA   | AGTGTATGTCCTCTTCCAAAAGC |
| Human <i>PLIN2</i>                         | ATGGCATCCGTTGCAGTTGAT   | GGACATGAGGTCATACGTGGAG  |
| Human <i>ACOX1</i>                         | ACTCGCAGCCAGCGTTATG     | AGGGTCAGCGATGCCAAAC     |
| Human <i>CPT1A</i>                         | TCCAGTTGGCTTATCGTGGTG   | TCCAGAGTCCGATTGATTTTTGC |

|                        |                     |                        |
|------------------------|---------------------|------------------------|
| Human $\beta$ -Tubulin | GGCCAAGGGTCACTACACG | GCAGTCGCAGTTTTTCACACTC |
|------------------------|---------------------|------------------------|

### 3 Antibody used in the present study

| Antibody         | Supplier                  | Catalog number   |
|------------------|---------------------------|------------------|
| CRSP8            | Invitrogen                | PA5-101981/52374 |
| CRSP8            | Immunoway                 | YT1122           |
| $\beta$ -Tubulin | Cell Signaling Technology | 2146             |
| PCNA             | Cell Signaling Technology | 13110            |
| Snail            | Cell Signaling Technology | 3879             |
| E-cadherin       | Cell Signaling Technology | 3195             |
| N-cadherin       | Cell Signaling Technology | 13116            |
| $\beta$ -catenin | Cell Signaling Technology | 9562             |
| FASN             | HUABIO                    | ET1701-91        |
| ACC1             | HUABIO                    | ET1609-77        |
| ACLY             | Cell Signaling Technology | 9441             |
| CD36             | Abcam                     | ab33625          |
| FABP4            | Cell Signaling Technology | 2120             |
| FABP5            | Cell Signaling Technology | 39926            |
| ATGL             | Cell Signaling Technology | 2138             |
| LAMP1            | Abcam                     | ab25630          |
| LAMP1            | Cell Signaling Technology | 9091             |
| ATG5             | Cell Signaling Technology | 12994            |
| PLIN2            | Abcam                     | ab108323         |
| p62              | Cell Signaling Technology | 39749            |
| LC3              | Cell Signaling Technology | 4108             |
| PPAR $\alpha$    | Abcam                     | ab126285         |
| PPAR $\alpha$    | Abclonal                  | A24835           |
| ACOX1            | Proteintech               | 10957-1-Ig       |
| CPT1A            | Proteintech               | 15184-1-Ig       |
| mTOR             | Cell Signaling Technology | 2983             |

|                               |                           |            |
|-------------------------------|---------------------------|------------|
| Phospho-mTOR                  | Cell Signaling Technology | 2971       |
| Histone H3                    | Cell Signaling Technology | 9715       |
| PPAR $\beta/\delta$           | Cell Signaling Technology | 74076      |
| PPAR $\gamma$                 | Cell Signaling Technology | 2430       |
| CRM1                          | Santa Cruz Biotechnology  | sc-74454   |
| CRM1                          | Proteintech               | 66763-1-Ig |
| RAN                           | Proteintech               | 67500-1-Ig |
| RAN                           | Santa Cruz Biotechnology  | sc-271376  |
| GAPDH                         | Cell Signaling Technology | 2118S      |
| Ki67                          | Cell Signaling Technology | 9129       |
| IKK $\alpha$                  | Cell Signaling Technology | 2682       |
| IKK $\beta$                   | Cell Signaling Technology | 8943       |
| Phospho-IKK $\alpha/\beta$    | Cell Signaling Technology | 2697       |
| I $\kappa$ B $\alpha$         | Cell Signaling Technology | 9242       |
| Phospho-I $\kappa$ B $\alpha$ | Cell Signaling Technology | 2859       |
| p65                           | Cell Signaling Technology | 8242       |
| Phospho-p65                   | Cell Signaling Technology | 3033       |
| Flag                          | Sigma-Aldrich             | F1804      |
| HA                            | Proteintech               | 51064-2-AP |
| Mouse Control IgG Antibody    | Abclonal                  | AC011      |
| PD-L1                         | Proteintech               | 66248-1-Ig |
| CD86                          | Cell Signaling Technology | 19589S     |
| CD206                         | Affinity                  | DF4149     |
| Foxp3                         | Servicebio                | GB112325   |
| CD8                           | Abclonal                  | A11856     |
| CD4                           | Abcam                     | ab183685   |
| F4/80                         | Cell Signaling Technology | 30325      |
| Anti-rabbit IgG, HRP-linked   | Cell Signaling Technology | 7076       |
| Anti-mouse IgG, HRP-linked    | Cell Signaling Technology | 7074       |

|                                  |                          |        |
|----------------------------------|--------------------------|--------|
| Anti-Rabbit IgG, Alexa Fluor 488 | Thermo Fisher Scientific | A21206 |
| Anti-Rabbit IgG, Alexa Fluor 647 | Thermo Fisher Scientific | A21222 |
| Anti-Mouse IgG, Alexa Fluor 488  | Thermo Fisher Scientific | A11001 |
| Anti-Mouse IgG, Alexa Fluor 647  | Thermo Fisher Scientific | A21235 |

4

5 **The reagent used in the present study**

| <b>Reagent</b>                              | <b>Supplier</b>          | <b>Catalog number</b> |
|---------------------------------------------|--------------------------|-----------------------|
| Rapamycin                                   | MedChemExpress           | HY-10219              |
| Chloroquine                                 | Sigma-Aldrich            | C6628                 |
| RIPA                                        | Beyotime Biotechnology   | P0013B                |
| DAPI                                        | Beyotime Biotechnology   | C1005                 |
| Triton X-100                                | Beyotime Biotechnology   | ST797-100ml           |
| PMSF                                        | Solarbio                 | P0100                 |
| TRIzol reagent                              | Invitrogen               | 15596018              |
| Phosphatase Inhibitor Cocktail I            | MedChemExpress           | HY-k0021              |
| Phosphatase Inhibitor Cocktail II           | MedChemExpress           | HY-k0022              |
| Dulbecco's Modified Eagle Medium            | Gibco                    | 11995065              |
| Roswell Park Memorial Institute 1640 medium | Gibco                    | C11875500BT           |
| Fetal bovine serum                          | Gibco                    | 10099-141             |
| Penicillin-Streptomycin                     | Thermo Fisher Scientific | 15140122              |
| Matrigel                                    | Corning                  | 356234                |
| BODIPY 493/503                              | Invitrogen               | D3922                 |
| Lysotracker™ Green DND-26                   | Thermo Fisher Scientific | L7526                 |
| Mito Tracker™ Deep Red FM                   | Thermo Fisher Scientific | M22426                |
| Phenylhydrazine (FCCP)                      | Sanbio                   | 1528-10               |
| Oligomycin                                  | Sigma-Aldrich            | 75351                 |
| Antimycin A                                 | Sigma-Aldrich            | A8674                 |
| Etomoxir                                    | MedChemExpress           | HY-50202              |
| BODIPY™ FL C16                              | Thermo Fisher Scientific | D3821                 |

|                                                |                        |            |
|------------------------------------------------|------------------------|------------|
| Orlistat                                       | MedChemExpress         | HY-B0218   |
| QuickBlock™ blocking buffer                    | Beyotime Biotechnology | P0220      |
| QuickBlock™ Primary Antibody Dilution Buffer   | Beyotime Biotechnology | P0256      |
| QuickBlock™ Secondary Antibody Dilution Buffer | Beyotime Biotechnology | P0258      |
| Trypsin                                        | Cytiva                 | SH30042.02 |
| Crystal Violet Staining Solution               | Beyotime Biotechnology | C0121      |
| Leptomycin B                                   | MedChemExpress         | HY-16909   |
| Importazole                                    | MedChemExpress         | HY-101091  |

6

#### 7 Kits used in the present study

| <b>Kits</b>                                    | <b>Supplier</b>                   | <b>Catalog number</b> |
|------------------------------------------------|-----------------------------------|-----------------------|
| ATP Assay kit                                  | Beyotime Biotechnology            | S0026                 |
| Dual-Luciferase Reporter Assay System          | Promega                           | E1910                 |
| BCA Protein Concentration kit                  | Beyotime Biotechnology            | P0012                 |
| Cell-Light EdU Apollo567 In Vitro kit          | RiboBio Co., Ltd.                 | C10310-1              |
| High-capacity cDNA Reverse Transcription Kit   | TAKARA                            | RR037B                |
| Co-immunoprecipitation Kit                     | Invitrogen                        | 10007D                |
| Tyramide Signal Amplification Kit              | Afantibody                        | AFIHC024              |
| SYBR Green Master Mix                          | TAKARA                            | RR420A                |
| BeyoECL Plus kit                               | Beyotime Biotechnology            | P0018M                |
| Triglyceride Assay                             | Abcam                             | ab65336               |
| Cholesterol Assay                              | Abcam                             | ab133116              |
| Fatty Acid Oxidation Assay                     | Abcam                             | ab217602              |
| Cell Counting Kit-8 test (CCK8)                | Dojindo Laboratories,<br>Kumamoto | CK04                  |
| Nuclear and Cytoplasmic Protein Extraction Kit | Beyotime Biotechnology            | P0028                 |
| Annexin V-EGFP/PI Apoptosis Detection Kit      | Keygentec                         | KGA1101               |

8

6

## 9 Supplementary Figure and Figure legends

10

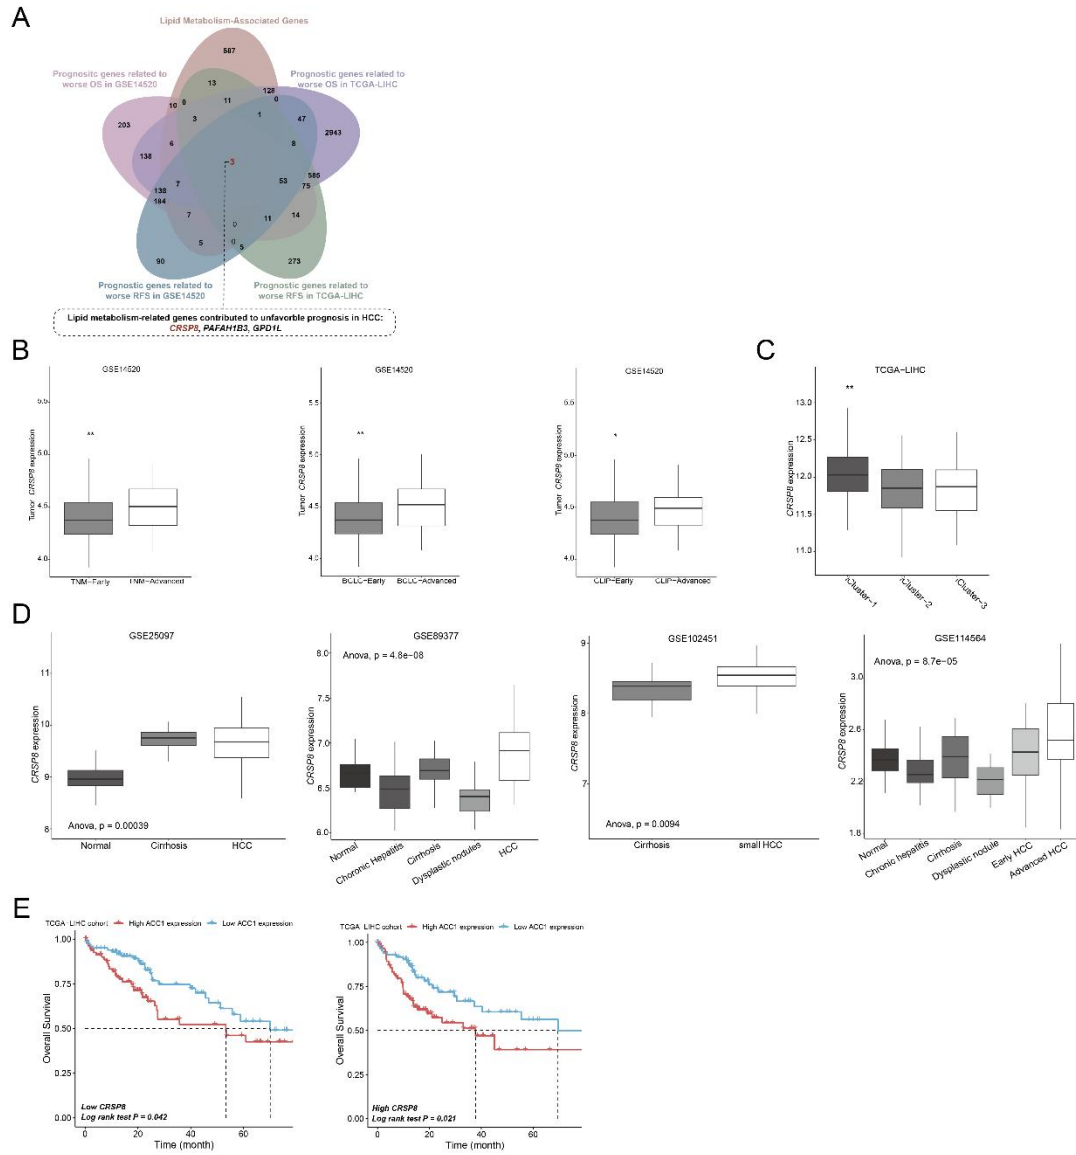

11

12 **Fig. S1. The expression difference of *CRSP8* mRNA in different clinical stages, progression**  
13 **and molecular subtypes in HCC were analyzed using Integrative HCC Gene Analysis (IHGA)**  
14 **online tools. Data were obtained in indicated public HCC-related datasets. Plots were**  
15 **created by IHGA online tools.**

16 **(A)** Lipid metabolism associated genes profiling strategy.

17 **(B)** In different clinical staging systems, patients were divided into late-stage and early-stage  
18 groups, and the *CRSP8* mRNA levels were compared between the two groups. Early= (TNM:  
19 I-II)/(BCLC:0/A-B)/(CLIP:<=2); Advanced= (TNM: III-IV)/(BCLC:C-D)/(CLIP:>2).

20 **(C)** The mRNA levels of *CRSP8* were compared in tumor tissues from HCC patients with  
21 different molecular subtypes.

22 **(D)** The levels of *CRSP8* mRNA were investigated at different step of HCC formation. Data are  
23 shown as median; \* $P < 0.05$ ; \*\* $P < 0.01$ ; \*\*\* $P < 0.001$ .

24 **(E)** Overall HCC survival data obtained from the TCGA-LIHC database for tumors showing  
25 *CRSP8*<sup>high</sup> expression (above the mean) versus *CRSP8*<sup>low</sup> expression (below the mean) with either  
26 *ACACA*<sup>Low</sup> or *ACACA*<sup>High</sup> expression.



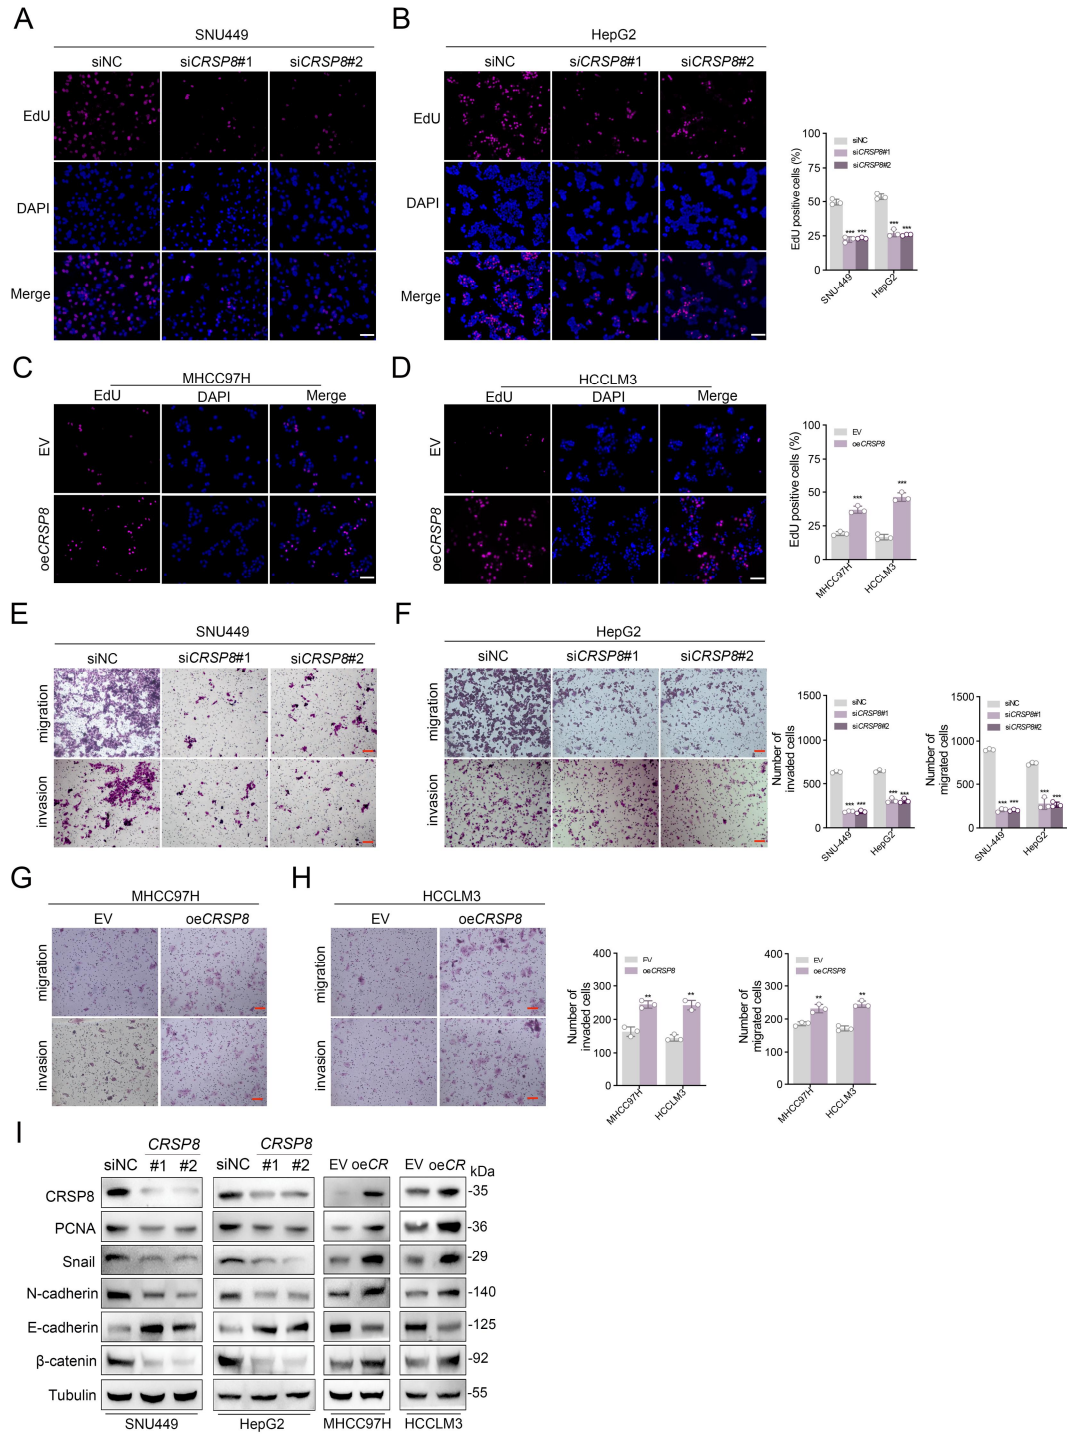

**Fig. S2. *CRSP8* promotes the proliferation and migration of HCC cells *in vitro*.**

(A-D) 5-ethynyl-20-deoxyuridine (EdU) assays of HCC cells treated as indicated, n = 3.

(E-H) Transwell migration and invasion assay using the indicated HCC cells.

(I) Western blot analysis of the expression of proliferation and EMT markers (PCNA, E-cadherin, N-cadherin,  $\beta$ -catenin, Snail) in HCC cells following *CRSP8* silencing or overexpression. Data are mean  $\pm$  SD. Unpaired two-tailed student's *t*-test or One-way ANOVA for multiple comparisons

34 were used to analyze the results presented in A-D, respectively.  $*P < 0.05$ ;  $**P < 0.01$ ;  $***P <$   
35 0.001.

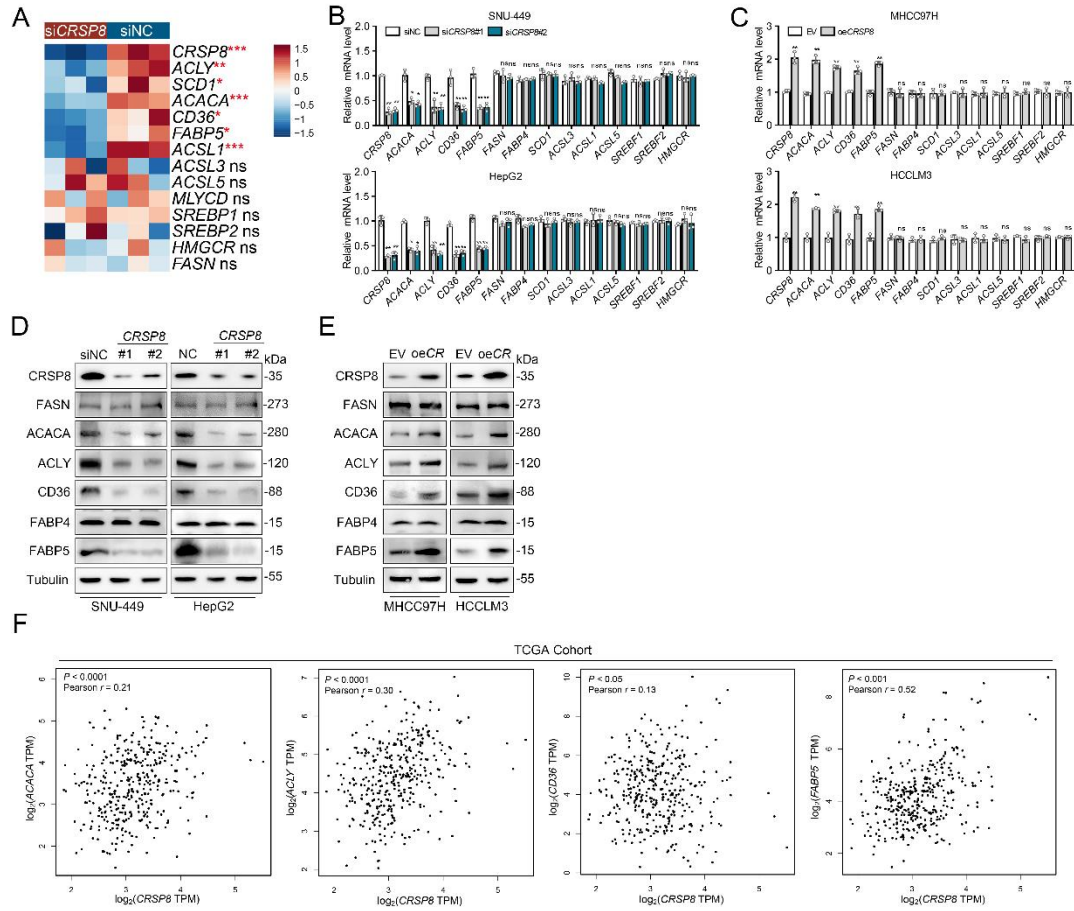

**Fig. S3. *CRSP8* promotes de novo lipogenesis via upregulation of lipogenic enzymes.**

(A) Heatmap showing dysregulation of genes involved in fatty acid synthesis (*SREBP1*, *ACLY*, *SCD1*, *ACACA*, *MLYCD*, *ACSL1*, *ACSL3*, *ACSL5*, and *FABP5*), fatty acid uptake (*CD36*), and cholesterol biosynthesis (*SREBP2* and *HMGCR*).

(B-C) Relative mRNA levels of indicated regulators of lipid metabolism following siRNA knockdown or plasmid overexpression of *CRSP8* in indicated HCC cells.

(D-E) Relative protein levels of indicated regulators of lipid metabolism following siRNA knockdown or plasmid overexpression of *CRSP8* in indicated HCC cells.

(F) Scatter plot analysis of correlation between mRNA levels of *CRSP8* and *ACACA*, *ACLY*, *CD36*, or *FABP5* in TCGA-LIHC cohort.

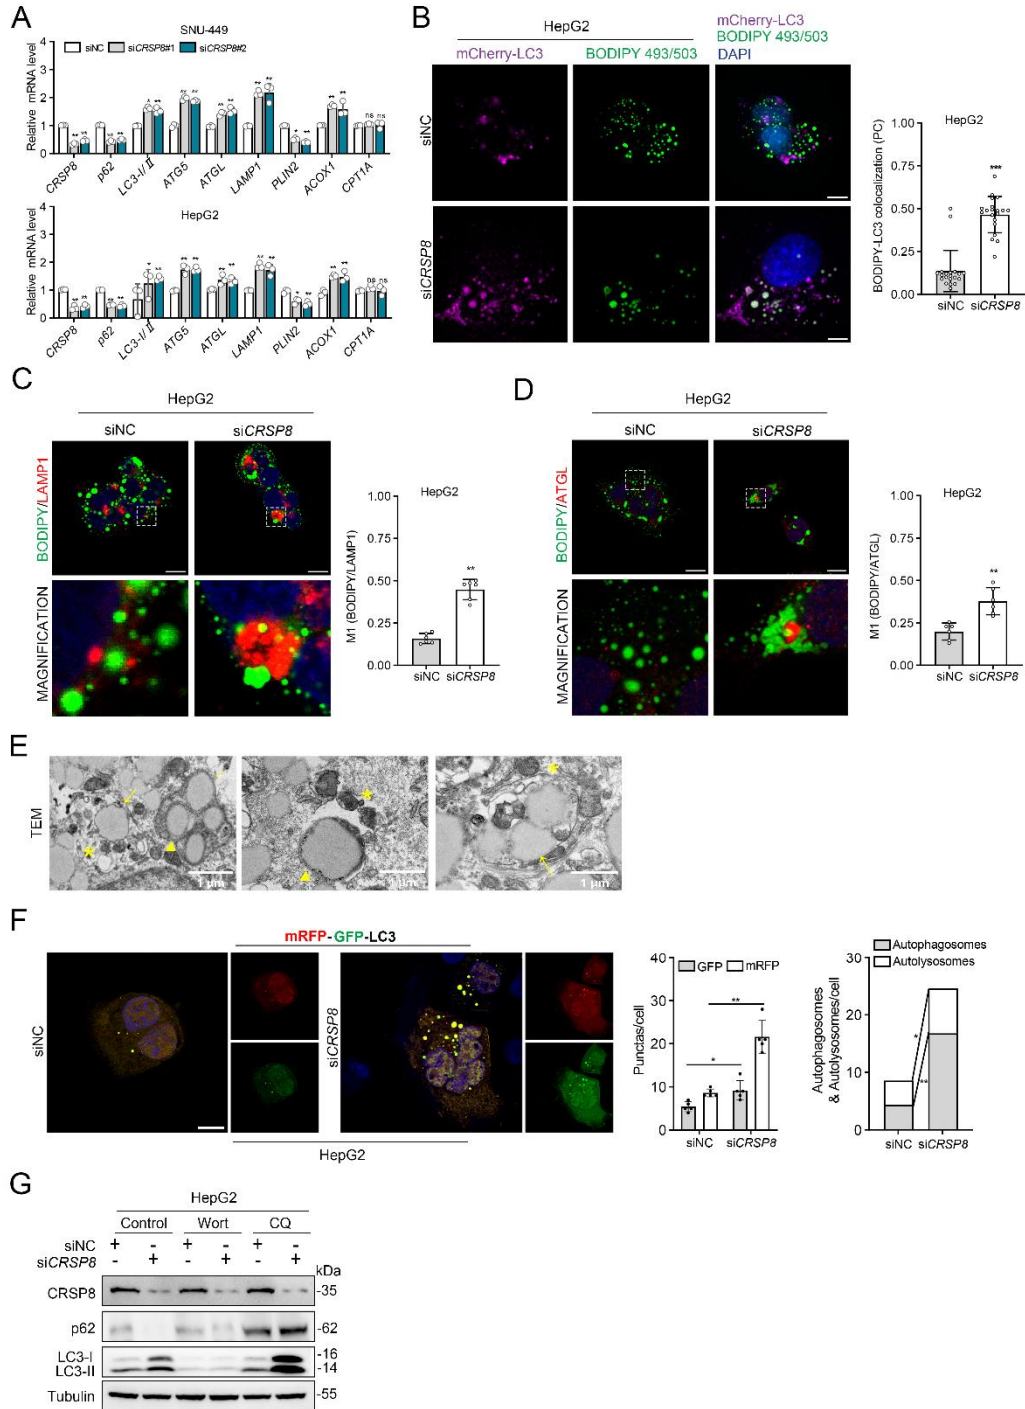

**Fig. S4. *CRSP8* knockdown activated lipophagy in HCC cells.**

(A) mRNA expressions of *PPARα* downstream and fatty acid oxidation related genes in SNU-449 and HepG2 cells with *CRSP8* knockdown (n = 3).

(B) Co-localization of BODIPY 493/503 staining of lipid droplets and mcherry-LC3 in the control and si*CRSP8* group of HepG2 cells (PC = Pearson coefficient). Nuclei are stained with DAPI.

Scale bars represent 10μm.

54 **(C-D)** Representative co-staining of BODIPY/LAMP1 and BODIPY/ATGL in HepG2 cells.  
 55 Nuclei were stained with DAPI. Scale bar, 10µm.

56 **(E)** Direct association of autophagosomes with LDs observed in electron micrographs of HepG2  
 57 cells with *CRSP8* knockdown. Arrowheads, autophagosomes; arrows, LDs; asterisks,  
 58 autolysosomes. Cells were fixed with 3% glutaraldehyde with Phosphate Buffer, the ultrathin  
 59 sections (70nm thick) were sectioned with microtome (Leica EM UC6) and examined by a  
 60 transmission electron microscope as described in the methods with more details.

61 **(F)** Representative images and quantification of autophagic flux in HepG2 cells (n = 5 per group).  
 62 Scale bar, 10µm.

63 **(G)** Western blot analysis of CRSP8, p62 and LC3 expression in the control and si*CRSP8* HepG2  
 64 cells treated with or without wortmannin (Wort) or chloroquine (CQ). Mean ± SD, n = 3 biological  
 65 replicates analyzed using unpaired Student's *t*-test (two-tailed) or Mann-Whitney test (two-tailed),  
 66 \**P* < 0.05; \*\**P* < 0.01; \*\*\**P* < 0.001.

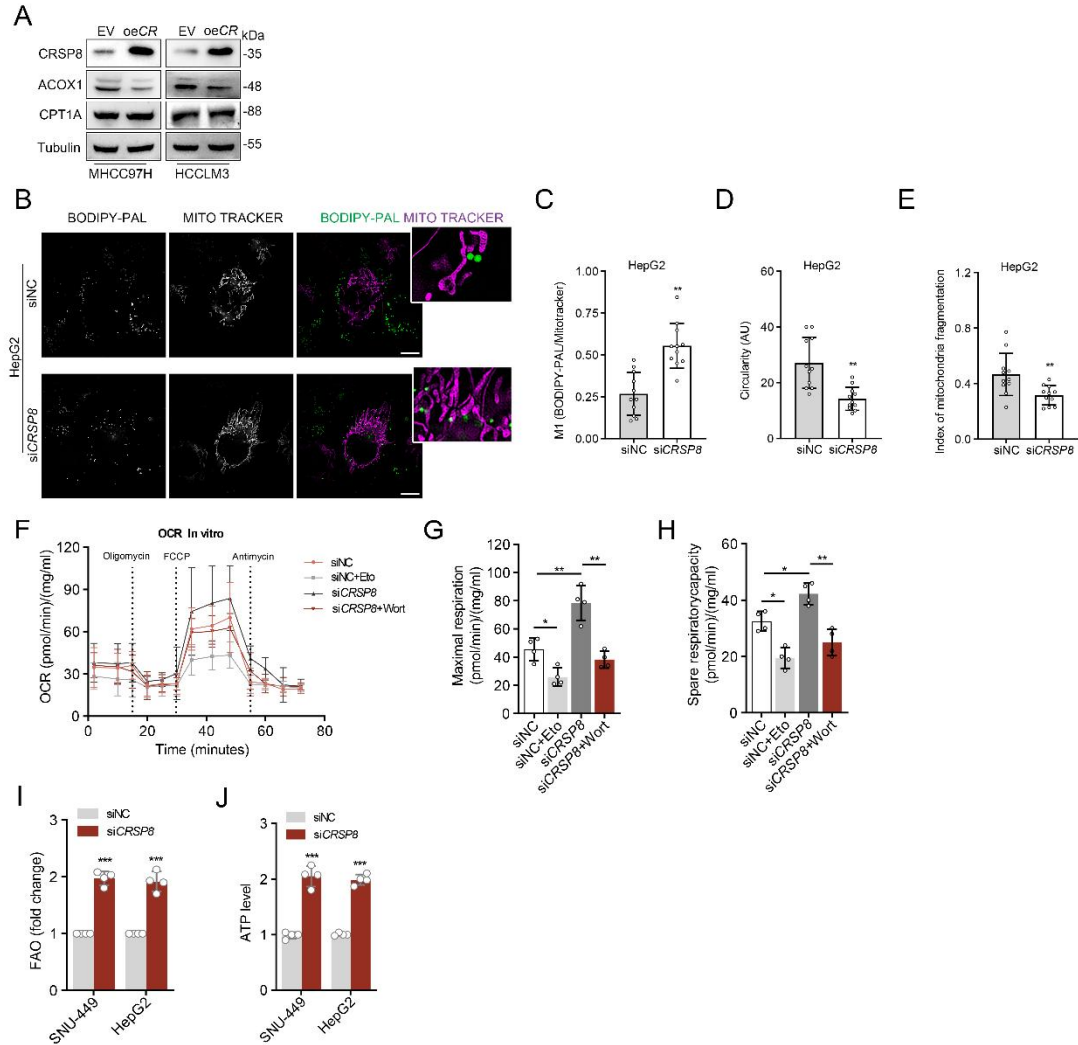

**Fig. S5. *CRSP8* knockdown activated FAO in HCC cells.**

(A) Western blotting demonstrates the effects of *CRSP8* overexpression on the expression of critical enzymes for FAO.

(B-E) Representative super resolution live images (B) of the control and siCRSP8 HepG2 cells pulsed with BODIPY-PAL (overnight incubation) and imaged after 24 h chase period. Scale bar, 10μm. Mitochondria were labeled with MitoTracker deep red (30 min) before imaging, colocalization index M1 (C), mitochondrial circularity (D), and index of mitochondrial fragmentation (number of mitochondria/ total mitochondrial area) (E). Zoomed boxed areas show colocalization of the mitochondria (magenta) with BODIPY-PAL-signals (green). Mean ± SD, n = 3 biological replicates analyzed using unpaired student's *t*-test (two-tailed).

(F-H) Oxygen consumption rate (OCR) (F) of siNC or siCRSP8 HepG2 cells measured in β-oxidation assay medium. Etomoxir (Eto, 40μM) and wortmannin (Wort) were added 15 min

80 prior to baseline measurement in  $\beta$ -oxidation assay medium. Maximal respiration (**G**) and Spare  
81 respiratory capacity (**H**) from OCR in (**F**). Mean  $\pm$  SD, n = 4 biological replicates analyzed using  
82 one-way ANOVA for multiple comparisons.  
83 (**I**) Fatty acid oxidation (FAO) assay of siNC or siCRSP8 SNU-449 and HepG2 cells  
84 supplemented with 2 mCi/mL [9,10-3H]-palmitic acid for 18 h.  
85 (**J**) ATP production was determined in SNU-449 and HepG2 cells transfected. Mean  $\pm$  SD, n = 4  
86 biological replicates analyzed using unpaired Student's *t*-test (two-tailed), \**P* < 0.05; \**P* < 0.01;  
87 \*\*\**P* < 0.001.

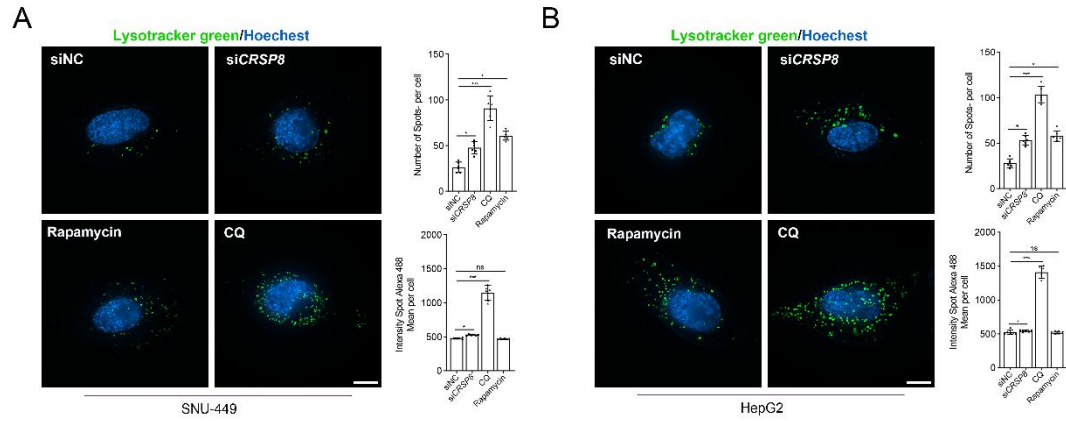

**Fig. S6. The effect of *CRSP8* expression on lysosomes.**

(A-B) Fluorescence microscopy images for cells stained with LysoTracker™ Green (lysosomes, green) 30 min after treatment. Right: surface plots of lysosome staining. Mean  $\pm$  SD, n = 6 biological replicates analyzed using One-way ANOVA for multiple comparisons, \* $P$  < 0.05; \*\* $P$  < 0.01; \*\*\* $P$  < 0.001.



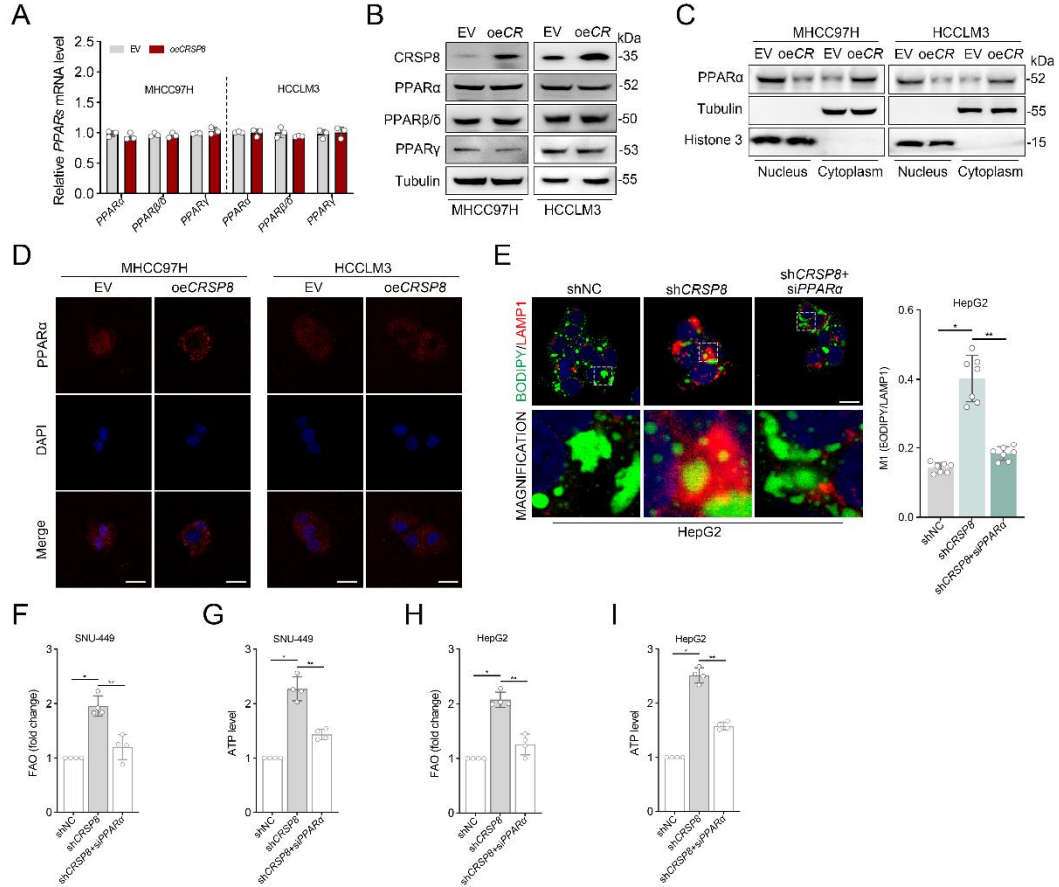

**Fig. S7. Impaired lipophagy and FAO induced by *CRSP8* is hepatic nPPAR $\alpha$ -dependent**

(A-B) qRT-PCR and Western blotting verify the expression of PPARs in MHCC97H and HCCLM3 cells with *CRSP8* overexpression. Mean  $\pm$  SD, n = 3 biological replicates analyzed using unpaired Student's *t*-test (two-tailed).

(C) PPAR $\alpha$  expression in cytoplasmic and nuclear fractions, as detected by immunoblot analysis. Tubulin was used as a loading control for the cytoplasmic fraction, and Histone 3 was used as a loading control for the nuclear fraction.

(D) PPAR $\alpha$  (red) expression in indicated MHCC97H and HCCLM3 cells, as detected by an immunofluorescence assay. The merged images show overlays of PPAR $\alpha$  (red) and nuclear staining by DAPI (blue). Scale bar, 10 $\mu$ m. Mean  $\pm$  SD, n = 3 biological replicates.

(E) Representative co-staining of BODIPY/LAMP1 in HepG2 cells with indicated treatment. Nuclei were stained with DAPI. Right, quantification of colocalization index M1 with ImageJ. Scale bar, 10 $\mu$ m. Mean  $\pm$  SD, n = 7 biological replicates.

(F-I) Fatty acid oxidation (FAO) assay of SNU-449 and HepG2 cells supplemented with 2 mCi/mL [9,10-3H]-palmitic acid for 18h (F, H). ATP production was determined in SNU-449 and

110 HepG2 cells transfected (**G, I**). Mean  $\pm$  SD, n = 4 biological replicates analyzed using unpaired  
111 student's *t*-test (two-tailed). \**P* < 0.05; \*\**P* < 0.01; \*\*\**P* < 0.001.

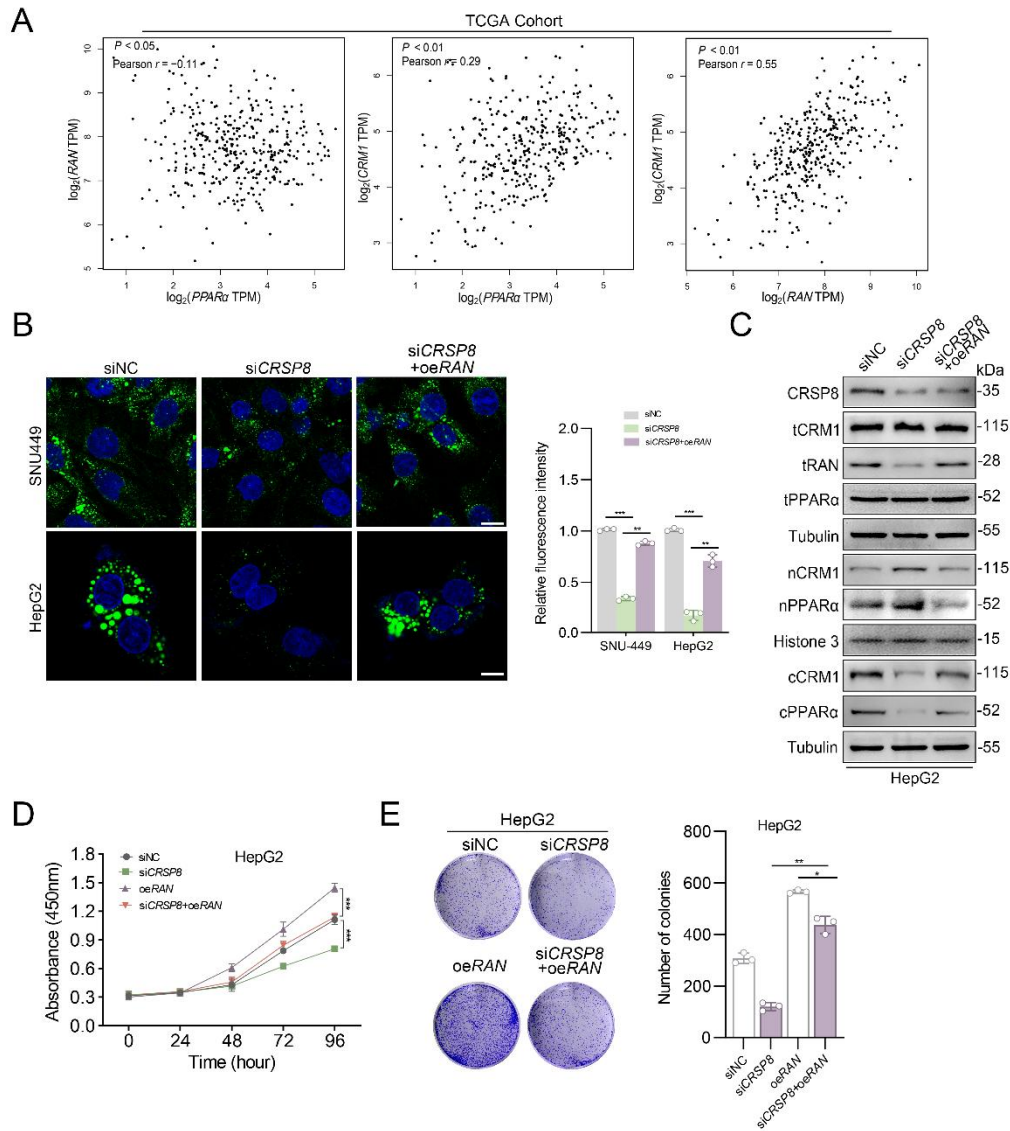

**Fig. S8. *CRSP8* regulates the nucleus-cytoplasm shuttling heterotrimer via transcriptionally activating *RAN*.**

(A) Pearson correlation analysis between the expression of PPARα, CRM1 and RAN in the TCGA-LIHC cohort.

(B) Neutral lipids stained with BODIPY 493/503 probe after *CRSP8* knockdown or *RAN* overexpression in HCC cells. Scale bar, 10 μm.

(C) *CRSP8*-knockdown cells were transfected with *RAN*-overexpressed plasmid and the total, nuclear, and cytoplasmic protein levels of CRM1 and PPARα were analyzed by immunoblotting.

(D) CCK8 proliferation assays were performed in HepG2 cells with *CRSP8* knockdown or *RAN* overexpression (n = 3).

123   **(E)** Colony formation assay was performed in HepG2 cells with *CRSP8* knockdown or *RAN*  
124   overexpression. Right, quantification of colony number.

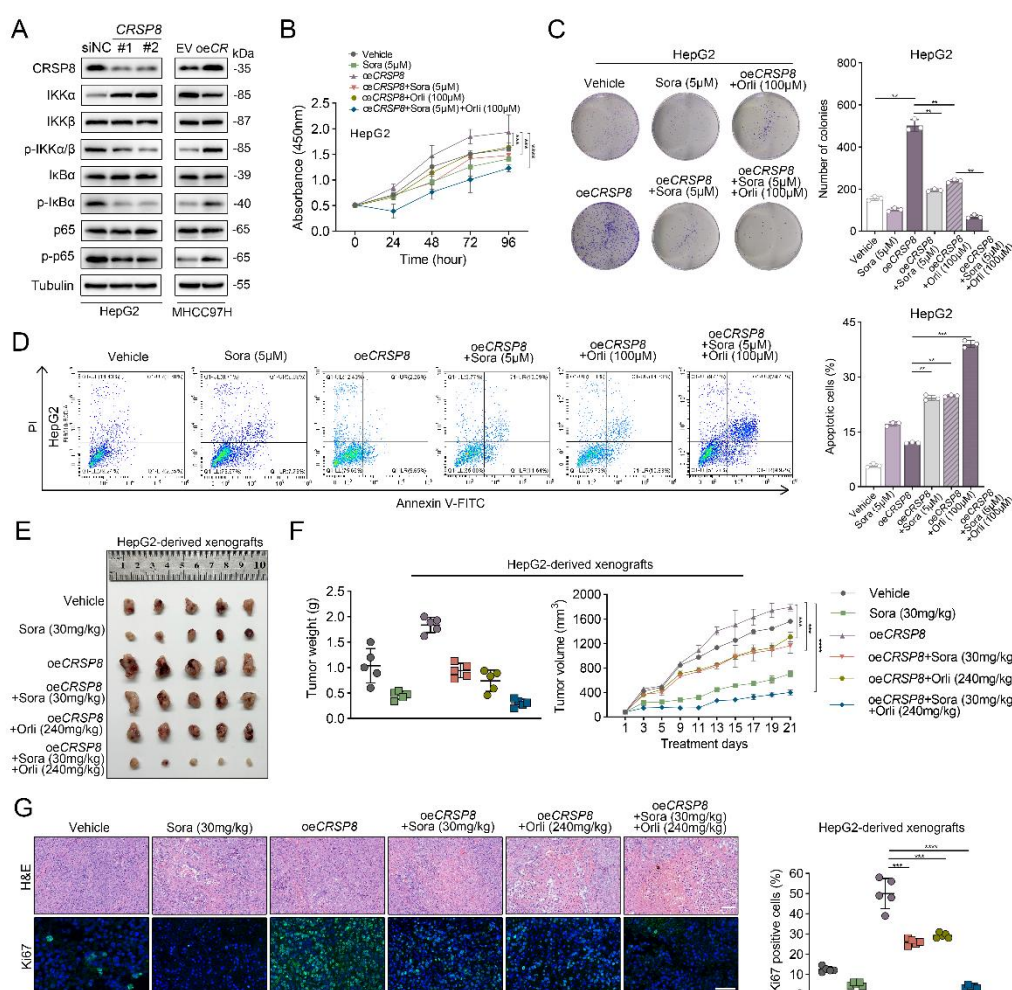

**Fig. S9. Combination of orlistat and sorafenib significantly inhibits HCC growth *in vitro* and *in vivo*.**

(A) Protein levels of phosphor-p65 and total p65 in HCC cells with CRSP8 knockdown and overexpression were analyzed by Western blot. (B-D) HepG2 and MHCC97H cells were treated with 100μM orlistat and 5μM sorafenib separately or in combination for indicated time, and cell proliferation was evaluated by CCK-8 assay (n = 3) (B) and colony formation assay (C). HepG2 and MHCC97H cells were treated with 100μM orlistat and 5μM sorafenib separately or in combination for 48h, and apoptosis was analyzed by flow cytometry (n = 3) (D). (E-G) Nude mice bearing HepG2-derived xenografts were intraperitoneally administered orlistat (240mg/kg) and/or orally administered sorafenib (30mg/kg) every day, n = 5. Representative images of the tumors (E), tumor growth curves and tumor weight (F), representative images of hematoxylin and eosin (G) (Scale bar, 100μm) and Ki67 staining (G) (Scale bar, 50μm) in tumor tissues are shown (n = 5). Data are analyzed using unpaired student's *t*-test (two-tailed). \**P* < 0.05; \*\**P* < 0.01;

139 \*\*\* $P < 0.001$ .
